# Supplementary material for: Significant role of symbiotic bacteria in the blood digestion and reproduction of Dermanyssus gallinae mites
Source: PubMed Central journal article supplement (PMC11550332; doi:10.1093/ismeco/ycae127), 2024-10-30
Supplement: supplementary_file_1_ycae127.pdf [file supplementary_file_1_ycae127.pdf]

**Table S1 The primers used in this study.**

| Group                                            | Name             | Primer (5'-3')                                         | Size<br>(bp) |
|--------------------------------------------------|------------------|--------------------------------------------------------|--------------|
| Universal, 16S rRNA,<br>PCR Pacbio               | 27F<br>1492R     | AGRGTTYGATYMTGGCTCAG<br>RGYTACCTTGTTACGACTT            | 1 500        |
| Universal, 16S rRNA,<br>qPCR                     | Com1<br>769R     | CAGCAGCCGCGGTAATAC<br>ATCCTGTTTGMTMCCCVCRC             | 270          |
| Universal ,16S rRNA,<br>PCR Illumina             | 338F<br>806R     | ACTCCTACGGGAGGCAGCAG<br>GGACTACHVGGGTWTCTAAT           | 468          |
| un-Rhi ( <i>Bartonella A</i> )<br>16S rRNA, PCR  | Bar1-F<br>Bar1-R | GGGGGAAAGATTTATCGGATT<br>TGAAGAAATCTATCTCTAAATCT<br>CA | 800          |
| un-Rhi ( <i>Bartonella A</i> )<br>16S rRNA, qPCR | Bar2-F<br>Bar2-R | GAAGCTAGCCGTTGGAAGTT<br>TGAAGAAATCTATCTCTAAATCT<br>CA  | 181          |
| <i>Kocuria</i><br>16S rRNA, PCR                  | Koc1-F<br>Koc1-R | CCACACTGGGACTGAGACAC<br>AGCCCCGAAAGGAAACAACA           | 709          |
| <i>Kocuria</i><br>16S rRNA, qPCR                 | Koc2-F<br>Koc2-R | CTTATCCCAGAGTCCAAGGT<br>ATGGCTCAGGACGAACGCTG           | 134          |

**Table S5 Summary of Sequence and Base Counts for 16S rRNA Amplicon Sequencing**

| Sample    | unfiltered reads number | Base number | Rarefied reads number |
|-----------|-------------------------|-------------|-----------------------|
| E1        | 48045                   | 19624292    | 43749                 |
| E2        | 54282                   | 22234827    | 43749                 |
| E3        | 54981                   | 22343440    | 43749                 |
| AF1 (EA1) | 60111                   | 24500236    | 43749                 |
| AF2 (EA2) | 54307                   | 22133958    | 43749                 |
| AF3 (EA3) | 61513                   | 25094155    | 43749                 |
| AM1       | 71847                   | 30347532    | 43749                 |
| AM2       | 64554                   | 26483455    | 43749                 |
| AM3       | 60891                   | 24866034    | 43749                 |
| SA1       | 63457                   | 26416098    | 43749                 |
| SA2       | 58470                   | 24100993    | 43749                 |
| SA3       | 61975                   | 25355855    | 43749                 |
| C1        | 58542                   | 23722967    | 43749                 |
| C2        | 58819                   | 24001891    | 43749                 |
| C3        | 57769                   | 23562187    | 43749                 |
| T1        | 53273                   | 22101656    | 43749                 |
| T2        | 46312                   | 19057626    | 43749                 |
| T3        | 49126                   | 20174737    | 43749                 |

**Table S6 Hemolytic activity of isolated bacteria from *D. gallinae***

| Bacterial genus         | The width of the lysis zones (mm) | Hemolysis type |
|-------------------------|-----------------------------------|----------------|
| <i>Bacillus</i> sp.     | 3.74±0.26                         | β              |
| <i>Clostridium</i> sp.  | 4.05±0.16                         | β              |
| <i>Pseudomonas</i> sp.  | 1.69±0.12                         | α              |
| <i>Enterococcus</i> sp. | 1.06±0.08                         | α              |
| <i>Proteus</i> sp.      | 7.54±0.36                         | β              |

**Table S7 Recovery of reproductive capacity of adult female mites after antibiotic treatment**

| Reproduction parameters | First blood feeding<br>(With antibiotics) | Second blood feeding<br>(No antibiotics) | Third blood feeding<br>(No antibiotics) | Fourth blood feeding<br>(No antibiotics) |
|-------------------------|-------------------------------------------|------------------------------------------|-----------------------------------------|------------------------------------------|
| Oviposition rate (%)    | 64.93±20.08 <sup>a</sup>                  | 92.62±0.86 <sup>ab</sup>                 | 96.66±1.52 <sup>b</sup>                 | 97.22±1.46 <sup>b</sup>                  |
| Fecundity               | 1.05±0.4 <sup>a</sup>                     | 2.23±0.12 <sup>b</sup>                   | 3.86±0.17 <sup>c</sup>                  | 4.28±0.24 <sup>cd</sup>                  |
| Hatching rate (%)       | 22.54±13.19 <sup>a</sup>                  | 69.91±3.45 <sup>b</sup>                  | 96.28±1.96 <sup>c</sup>                 | 95.72±2.00 <sup>cd</sup>                 |

The data are expressed as the mean ± SD

a, b, c, d Values within the same row followed by different letters are significantly different

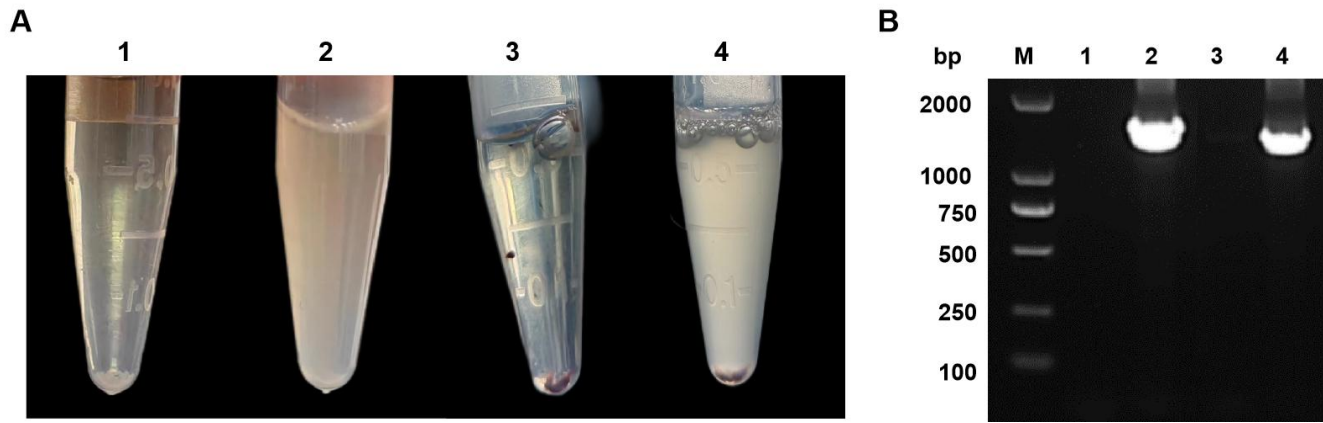

**Fig. S1 Evaluation of surface sterilization efficiency *D. gallinae* mites and their eggs.** **A** Photo images of LB media after external washing mites or eggs and subsequent thermal culturing. 1: surface-cleaned eggs; 2: no treatment eggs; 3: surface-cleaned mites; 4: no treatment mites. **B** PCR amplification of the bacterial 16S rRNA genes from the corresponding media in Fig A.

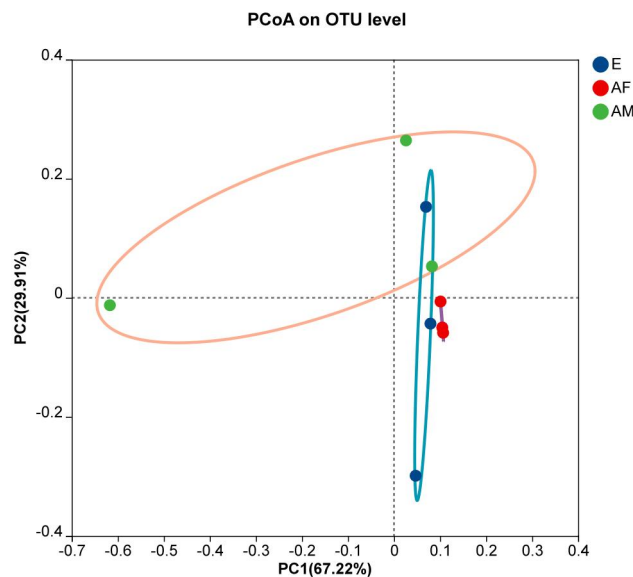

**Fig. S2 The PCoA analysis for bacterial community composition in based on Bray-Curtis.** Distances between points on the ordination plot reflect relative dissimilarities in microbiome structures. E, AF, and AM indicated the egg, fed adult female, and adult male, respectively.

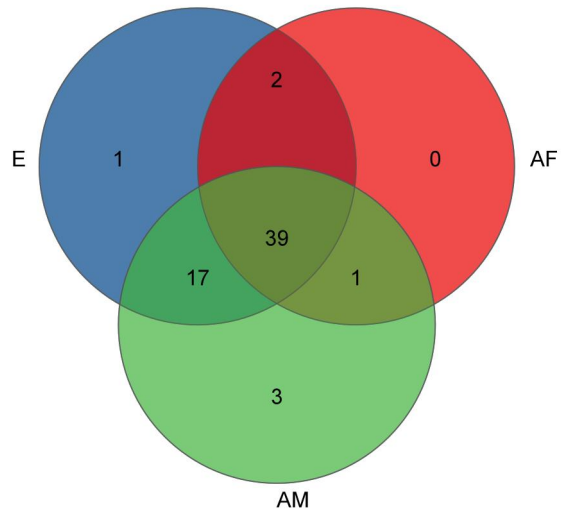

**Fig. S3 Venn diagram representing the distribution of the OTUs across different groups of *D. gallinae*.** Shared bacteria OTUs are shown in core. E, AF, and AM indicated the eggs, fed adult females, and adult males, respectively.

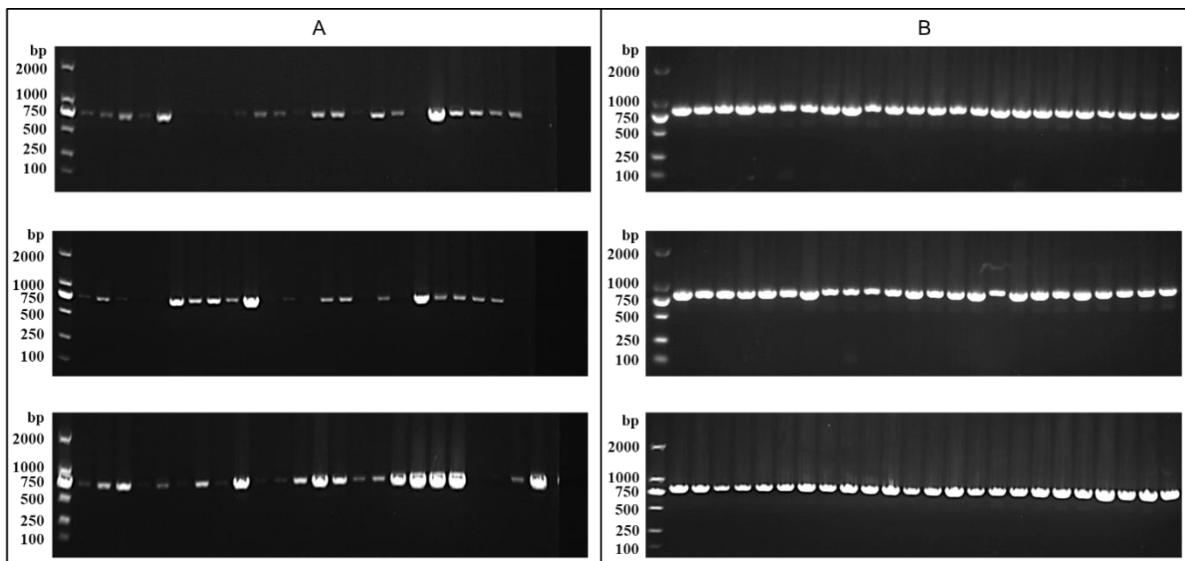

**Fig. S4 Detection of infection rates of core bacteria in individual adult female mites by specific PCR amplification. A *Kocuria*; B *Bartonella A*.**

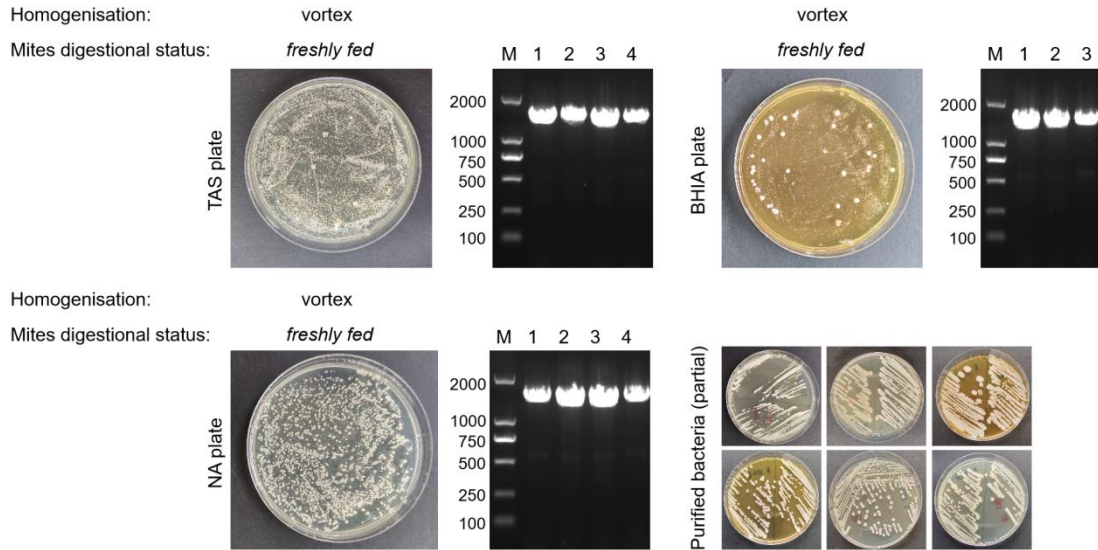

**Fig. S5. Agar cultivation and 16S rRNA gene amplification of bacteria isolated from dissected midguts of *D. gallinae* mites.** A homogenisation procedure was applied on midguts of freshly fed *D. gallinae* adult females. Samples from different plates were taken for DNA isolation and 16S rRNA amplification with subsequent Sanger sequencing. Individual sequences are shown below as Supplementary Data S1.

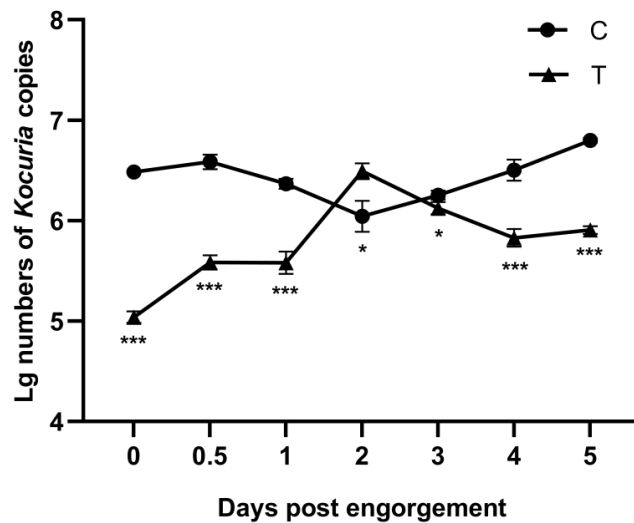

**Fig. S6 The effect of antibiotics treatment on *Kocuria* abundance in *D. gallinae*.** The quantification of numbers of copies of *Kocuria* 16S rRNA gene in control and treatment groups. The data are Log10 transformed. Asterisks indicate the statistical significance: \*p-value < 0.05; \*\*p-value < 0.01; \*\*\*p-value < 0.001 in the Student's t test.

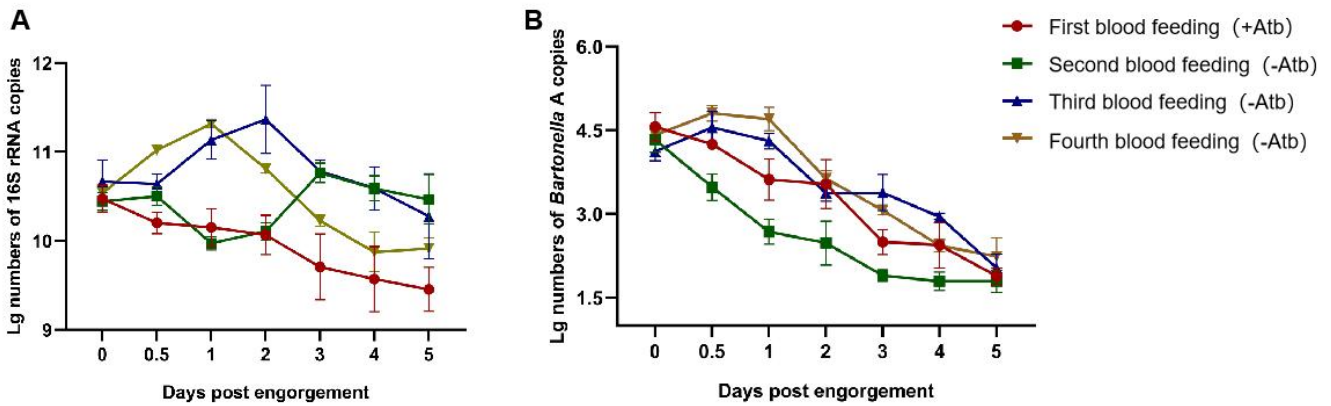

**Fig. S7. Recovery of bacterial load of adult female mites after antibiotic treatment.** The quantification of numbers of copies of 16S rRNA gene in different groups. The data are Log<sub>10</sub> transformed. **A** Numbers of copies obtained from adult females by universal primers. **B** Numbers of copies obtained from adult females by *Bartonella A* specific primers. +Atb: The mites fed on OTC-treated chicken. -Atb: The mites fed on non-treated chicken.

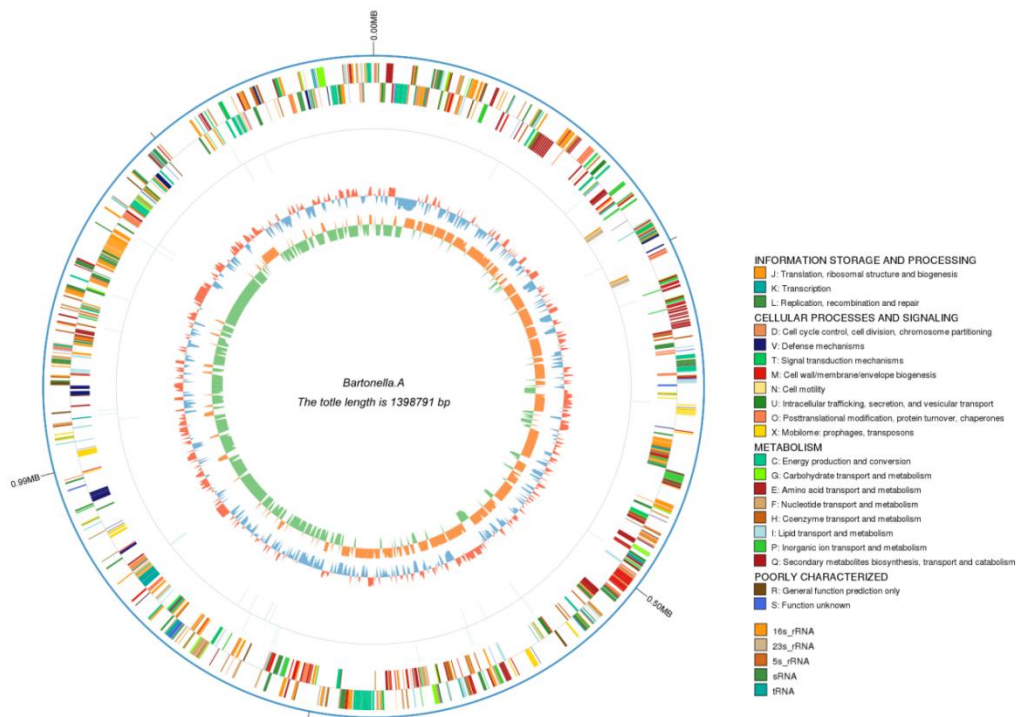

**Fig. S8. Circular genome representation map of the *Bartonella A* symbiont.** From outside to the centre: genome sequence of coordinates, genes on forward strand (colour by COG categories), genes on reverse strand (colour by COG categories), ncRNA, GC content, GC skew.

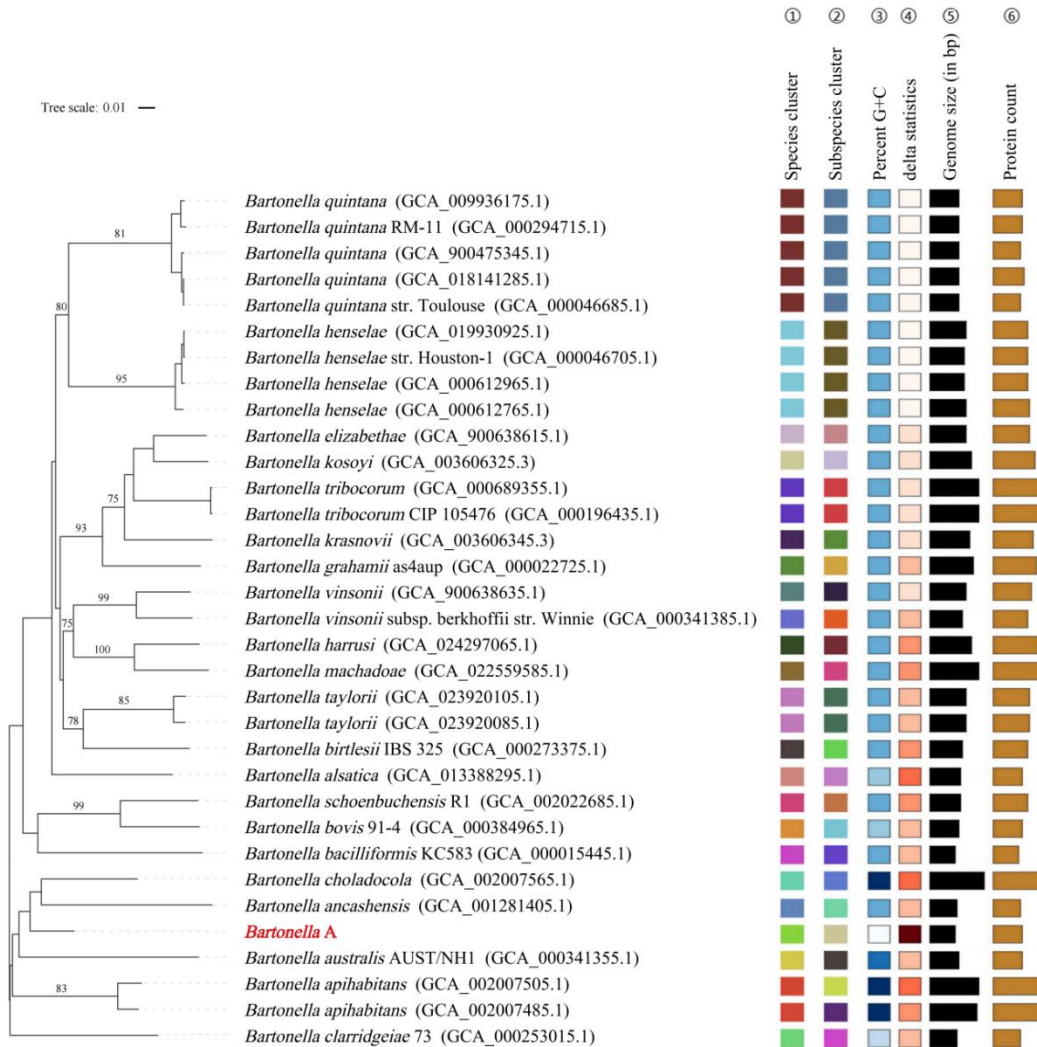

**Fig. S9. Whole-genome-based phylogeny.** The resulting intergenomic distances were used to infer a balanced minimum evolution tree with branch support via FASTME 2.1.6.1. Branch support was inferred from 100 pseudo-bootstrap replicates each, and values > 75% are shown above branches. Leaf labels are annotated by affiliation to species ① and subspecies ② clusters, genomic G+C content ③,  $\delta$



values ④, overall genome sequence length ⑤, number of proteins ⑥. Numbers in brackets indicate NCBI accession numbers.

**Supplementary Data S1. Nucleotide sequences of 16S rRNA amplicons acquired from agar plates culturing and electrophoretic separation above.**

>TSA1 *Staphylococcus*

TAAACAGTGGGGCCGGCTTAATACATGCAAGTCGAGCGAACAGATAAGGAGCTTGCTCCTTT  
GACGTTAGCGGCGGAAGGGTGAGTAACACGTGGGTAACCTACCTATAAGACTGGGATAACTT  
CGGGAAACCGGAGCTAATACCGGATAACATTTGGAACCGCATGGTTCTAAAGTGAAAGATGG  
TTTTGCTATCACTTATAGATGGACCCGCGCCGTATTAGCTAGTTGGTAAGGTAACGGCTTACC  
AAGGCGACGATACGTAGCCGACCTGAGAGGGTGATCGGCCACACTGGAAGTGAAGACACGGT  
CCAGACTCCTACGGGAGGCAGCAGTAGGGAATCTTCCGCAATGGGCGAAAGCCTGACGGAG  
CAACGCCGCGTGAGTGATGAAGGGTTTCGGCTCGTAAACTCTGTTATTAGGGAAGAACAA  
ATGTGTAAGTAACTGTGCACATCTTGACGGTACCTAATCAGAAAGCCACGGCTAACTACGTG  
CCAGCAGCCGCGGTAATACGTAGGTGGCAAGCGTTATCCGGAATTATTGGGCGTAAAGCGCG  
CGTAGGCGGTTTCTTAAGTCTGATGTGAAAGCCCACGGCTCAACCGTGGAGGGTCATTGGAA  
ACTGGGAAACTTGAGTGCAGAAGAGGAAAGTGGAATTCCATGTGTAGCGGTGAAATGCGCA  
GAGATATGGAGGAACACCAGTGGCGAAGGCGACTTTCTGGTCTGTAAGTGAAGTGAAGTGA  
CGAAAGCGTGGGGATCAAACAGGATTAGATACCCTGGTAGTCCACGCCGTAAACGATGAGT  
GCTAAGTGTTAGGGGGTTTCCGCCCCTTAGTGCTGCAGCTAACGCATTAAGCACTCCGCCTG  
GGGAGTACGACCGCAAGGTTGAAACTCAAAGGAATTGACGGGGACCCGCACAAGCGGTGG  
AGCATGTGGTTTAATTCGAAGCAACGCGAAGAACCTTACCAAATCTTGACATCCTTTGAAAA  
CTCTAGAGATAGAGCCTTCCCCTTCGGGGGACAAAGTGACAGGTGGTGCATGGTTGTCGTCA  
GCTCGTGTCGTGAGATGTTGGGTTAAGTCCCGCAACGAGCGCAACCCTTAAGCTTAGTTGCC  
ATCATTAAAGTTGGGCACTCTAAGTTGACTGCCGGTGACAAACCGGAGGAAGGTGGGGATGA  
CGTCAAATCATCATGCCCCTTATGATTTGGGCTACACACGTGCTACAATGGACAATACAAAGG

GCAGCTAAACCGCGAGGTCATGCAAATCCCATAAAGTTGTTCTCAGTTCGGATTGTAGTCTG  
CAACTCGACTACATGAAGCTGGAATCGCTAGTAATCGTAGATCAGCATGCTACGGTGAATACG  
TTCCCGGGTCTTGTACACACCGCCCGTCACCCCACGAGAGTTTGTAAACCCGAAGCCGGTG  
GAGTAACCATTATGGAGCTAGCCGTCGAAAGGGTGAACCAAAGGGG

>TSA2 *Staphylococcus*

GCACCTGGGCGGCGTGCCTATACATGCAAGTCGAGCGAACAGATAAGGAGCTTGCTCCTTTG  
ACGTTAGCGGCGGACGGGTGAGTAACACGTGGGTAACCTACCTATAAGACTGGGATAACTTC  
GGGAAACCGGAGCTAATACCGGATAACATTTGGAACCGCATGGTTCTAAAGTGAAAGATGGT  
TTTGCTATCACTTATAGATGGACCCGCGCCGTATTAGCTAGTTGGTAAGGTAACGGCTTACCA  
AGGCGACGATACGTAGCCGACCTGAGAGGGTGATCGGCCACACTGGAAGTGAAGACACGGTC  
CAGACTCCTACGGGAGGCAGCAGTAGGGAATCTTCCGCAATGGGCGAAAGCCTGACGGAGC  
AACGCCGCGTGAGTGATGAAGGGTTTCGGCTCGTAAACTCTGTTATTAGGGAAGAACAAT  
GTGTAAGTAACTGTGCACATCTTGACGGTACCTAATCAGAAAGCCACGGCTAACTACGTGCC  
AGCAGCCGCGGTaATACGTAGGTGGCAAGCGtTATCCGGAATTATTGGGCGTAAAGCGCGCGT  
AGGCGGTTTCTTAAGTCTGATGTGAAAGCCCACGGCTCAACCGTGGAGGGTCATTGGAAAC  
TGGGAAACTTGAGTGCAGAAGAGGAAAGTGGAATTCATGTGTAGCGGTGAAATGCGCAGA  
GATATGGAGGAACACCAGTGGCGAAGGCGACTTTCTGGTCTGTAAGTGAAGCTGATGTGCG  
AAAGCGTGGGGATCAAACAGGATTAGATACCCTGGTAGTCCACGCCGTAAACGATGAGTGCT  
AAGTGTTAGGGGGTTTCCGCCCTTAGTGCTGCAGCTAACGCATTAAGCACTCCGCCTGGGG  
AGTACGACCGCAAGGTTGAAACTCaAAGGAATTGACGGGGACCCGCACAAGCGGTGGAGCA  
TGTGGTTTAATTCGAAGCAACGCGaAGAACCTTACCAAATCTTGACATCCTTTGaAAACTCTA  
GAGATAGAGCCTTCCCCTTCGGGGGACAAAGTGACAGGTGGTGCATGGTTGTCGTCAGCTC  
GTGTCGTGAGATGTTGGGTAAAGTCCCGCAACGAGCGCAACCCTTAAGCTTAGTTGCCATCA  
TTAAGTTGGGCACTCTAGGTTGACTGCCGGTGACAAACCGGAGGAAGGTGGGGATGACGTC  
AAATCATCATGCCCTTATGATTTGGGCTACACACGTGCTACAATGGACAATACAAAGGGCAG  
CTAAACCGCGAGGTCATGCAAATCCCATAAAGTTGTTCTCAGTTCGGATTGTAGTCTGCAACT  
CGACTACATGAAGCTGGAATCGCTAGTAATCGTAGATCAGCATGCTACGGTGAATACGTTCCC

GGGTCTTGTACACACCGCCCGTCACACCACGAGAGTTTGTAAACACCCGAAGCCGGTGGAGT  
AACCATTTATGGAGCTAGCCCGTCGAAAGGGTGGACCCAAGATTG

>TSA3 *Staphylococcus*

AGGCACAGTGGCGGCCGGTGCCTAATACATGCAAGTCGAGCGAACAGATAAGGAGCTTGCT  
CCTTTGACGTTAGCGGGCGGAAGGGTGAAGTAAACACGTGGGTAACCTACCTATAAGACTGGGAT  
AACTTCGGGAAACCGGAGCTAATACCGGATAACATTTGGAACCGCATGGTTCTAAAGTGAAA  
GATGGTTTTGCTATCACTTATAGATGGACCCGCGCCGTATTAGCTAGTTGGTAAGGTAACGGC  
TTACCAAGGCGACGATACGTAGCCGACCTGAGAGGGTGATCGGCCACACTGGAAGTGAAGAC  
ACGGTCCAGACTCCTACGGGAGGCAGCAGTAGGGAATCTTCCGCAATGGGCGAAAGCCTGA  
CGGAGCAACGCCGCGTGAGTGATGAAGGGTTTCGGCTCGTAAACTCTGTTATTAGGGAAG  
AACAATGTGTAAGTAACTGTGCACATCTTGACGGTACCTAATCAGAAAGCCACGGCTAACT  
ACGTGCCAGCAGCCGCGGTAATACGTAGGTGGCAAGCGTTATCCGGAATTATTGGGCGTAAA  
GCGCGCGTAGGCGGTTTCTTAAGTCTGATGTGAAAGCCACGGCTCAACCGTGGAGGGTCAT  
TGAAACTGGGAAACTTGAGTGCAGAAGAGGAAAGTGAATTCCATGTGTAGCGGTGAAAT  
GCGCAGAGATATGGAGGAACACCAGTGGCGAAGGCGACTTTCTGGTCTGTAAGTGAAGCTG  
ATGTGCGAAAGCGTGGGGATCAAACAGGATTAGATACCCTGGTAGTCCACGCCGTAAACGAT  
GAGTGCTAAGTGTTAGGGGGTTTCCGCCCTTAGTGCTGCAGCTAACGCATTAAGCACTCCG  
CCTGGGGAGTACGACCGCAAGGTTGAAACTCAAAGGAATTGACGGGGACCCGCACAAGCG  
GTGGAGCATGTGGTTTAATTCGAAGCAACGCGAAGAACCTTACCAAATCTTGACATCCTTTG  
AAAACCTCTAGAGATAGAGCCTTCCCCTTCGGGGGACAAAGTGACAGGTGGTGCATGGTTGT  
CGTCAGCTCGTGTCGTGAGATGTTGGGTAAAGTCCCGCAACGAGCGCAACCCTTAAGCTTAG  
TTGCCATCATTAAAGTTGGGCACTCTAAGTTGACTGCCGGTGACAAACCGGAGGAAGGTGGG  
GATGACGTCAAATCATCATGCCCTTATGATTTGGGCTACACACGTGCTACAATGGACAATAC  
AAAGGGCAGCTAAACCGCGAGGTCATGCAAATCCCATAAAGTTGTTCTCAGTTCGGATTGTA  
GTCTGCAACTCGACTACATGAAGCTGGAATCGCTAGTAATCGTAGATCAGCATGCTACGGTG  
AATACGTTCCCGGGTCTTGTACACACCGCCCGTCACCCCACGAGAGTTTGTAAACACCCGAAG  
CCGGTGGAGTAACCATTTATGGAGCTAGCCCGTCGAAAGGTGGAACCAAAAATTT

>TSA4 *Koucria*

GGCACGTGGCGGCGTGCTTACCATGCAAGTCGAACGCTGAAGCTTGGTGCTTGCACCGGGT  
GGATGAGTGGCGAACGGGTGAGTAATACGTGAGTGACCTACCTTGGACTCTGGGATAAGCCT  
GGGAAACTGGGTCTAATACCGGATATGACCAATGGGCGCATGCTCTGTTGGTGGAAAGGGTT  
TGTA CTGGTCTTTGATGGGCTCACGGCCTATCAGCTTGTGGTGAGGTAATGGCTTACCAAGG  
CGACGACGGGTAGCCGGCCTGAGAGGGTGACCGGCCACACTGGGACTGAGACACGGCCCA  
GACTCCTACGGGAGGCAGCAGTGGGGAATATTGCACAATGGGCGCAAGCCTGATGCAGCGA  
CGCCGCGTGAGGGATGACGGCCTTCGGGTTGTAAACCTCTTTCAGCAGGGAAGAAGCGAAA  
GTGACGGTACCTGCAGAAGAAGCGCCGGCTAACTACGTGCCAGCAGCCGCGGTAATACGTA  
GGGCGCAAGCGTTGTCCGGAATTATTGGGCGTAAAGAGCTCGTAGGCGGTTTGTGCGTCTG  
CTGTGAAAGCCCGGGGCTTAACCCCGGGTGTGCAGTGGGTACGGGCAGGCTAGAGTGCAGT  
AGGGGAGACTGGAATTCCTGGTGTAGCGGTGAAATGCGCAGATATCAGGAGGAACACCGAT  
GGCGAAGGCAGGTCTCTGGGCTGTTACTGACGCTGAGGAGCGAAAGCATGGGGAGCGAAC  
AGGATTAGATACCCTGGTAGTCCATGCCGTAAACGTTGGGCACTAGGTGTGGGGGACATTCC  
ACGTTTTCCGCGCCGTAGCTAACGCATTAAGTGCCCCGCCTGGGGAGTACGGCCGCAAGGCT  
AAA ACTCAAAGGAATTGACGGGGGCCCCGCACAAGCGGCGGAGCATGCGGATTAATTCGATG  
CAACGCGAAGAACCTTACCAAGGCTTGACATACACCGGATCGCAGCAGAGATGTTGTTTCCT  
TTCGGGGCTGGTGTACAGGTGGTGCATGGTTGTCGTCAGCTCGTGTGCGTGAGATGTTGGGTT  
AAGTCCCGCAACGAGCGCAACCCTCGTTCTATGTTGCCAGCACGTGATGGTGGGGACTCATA  
GGAGACTGCCGGGGTCAACTCGGAGGAAGGTGGGGATGACGTCAAATCATCATGCCCTTA  
TGTCTTGGGCTTCACGCATGCTACAATGGCCGGTACAATGGGTTGCGATACTGTGAGGTGGA  
GCTAATCCCAAAAAGCCGGTCTCAGTTCGGATTGGGGTCTGCAACTCGACCCCATGAAGTCG  
GAGTCGCTAGTAATCGCAGATCAGCAACGCTGCGGTGAATACGTTCCCGGGCCTTGTACACA  
CCGCCCGTCAAGTCACGAAAGTCGGTAACACCCGAAGCCGATGGCCTAACCCCTTGTGGGG  
GGAGTCGTCGAAAGTTGACCGGTCCT

>NA1 *Escherichia*

CAATTGGCGGCAGGCCTACACATGCAAGTCGAACGGTAACAGGAAGCAGCTTGCTTCTTTG

CTGACGAGTGGCGGACGGGTGAGTAATGTCTGGGAAACTGCCTGATGGAGGGGGATAACTA  
CTGGAAACGGTAGCTAATACCGCATAACGTCGCAAGACCAAAGAGGGGGACCTTCGGGCCT  
CTTGCCATCGGATGTGCCAGATGGGATTAGCTAGTAGGTGGGGTAACGGCTCACCTAGGCG  
ACGATCCCTAGCTGGTCTGAGAGGATGACCAGCCACACTGGAAGTGAAGACACGGTCCAGAC  
TCCTACGGGAGGCAGCAGTGGGGAATATTGCACAATGGGCGCAAGCCTGATGCAGCCATGC  
CGCGTGTATGAAGAAGGCCTTCGGGTTGTAAAGTACTTTCAGCGGGGAGGAAGGGAGTAAA  
GTTAATACCTTTGCTCATTGACGTTACCCGCAGAAGAAGCACCGGCTAACTCCGTGCCAGCA  
GCCGCGGTAATACGGAGGGTGCAAGCGTTAATCGGAATTACTGGGCGTAAAGCGCACGCAG  
GCGGTTTGTAAAGTCAGATGTGAAATCCCCGGGCTCAACCTGGGAACTGCATCTGATACTGG  
CAAGCTTGAGTCTCGTAGAGGGGGGTAGAATTCCAGGTGTAGCGGTGAAATGCGTAGAGAT  
CTGGAGGAATAACGGTGGCGAAGGCGGCCCCCTGGACGAAGACTGACGCTCAGGTGCGAA  
AGCGTGGGGAGCAAACAGGATTAGATACCCTGGTAGTCCACGCCGTAAACGATGTCGACTTG  
GAGGTTGTGCCCTTGAGGCGTGGCTTCCGGAGCTAACGCGTTAAGTCGACCGCCTGGGGAG  
TACGGCCGCAAGGTTAAAACTCAAATGAATTGACGGGGGCCCGCACAAAGCGGTGGAGCATG  
TGGTTAATTCGATGCAACGCGAAGAACCTTACCTGGTCTTGACATCCACGGAAGTTTTTCAG  
AGATGAGAAGGTGCCTTCGGGAACCGTGAGACAGGTGCTGCATGGCTGTCGTCAGCTCGTG  
TTGTGAAATGTTGGGTAAAGTCCCGCAACGAGCGCAACCCTTATCCTTTGTTGCCAGCGGTC  
CGGCCGGGAACTCAAAGGAGACTGCCAGTGATAAACTGGAGGAAGGTGGGGATGACGTCA  
AGTCATCATGGCCCTTACGACCAGGGCTACACACGTGCTACAATGGCGCATACAAAGAGAAG  
CGACCTCGCGAGAGCAAGCGGACCTCATAAAGTGCGTCTAGTCCGGATTGGAGTCTGCAA  
CTCGACTCCATGAAGTCGGAATCGCTAGTAATCGTGGATCAGAATGCCACGGTGAATACGTT  
CCCGGGCCTTGTACACACCGCCCGTCACACCATGGGAGTGGGTTGCAAAAGAAGTAGGTAG  
CTAACCTTCGGGAGGGCGCCTACCAACTTGGATTTAATGGGGGGGTG

>NA2 *Staphylococcus*

AAACGTGCCGGGGGGCTAATACATGCAAGTCGAGCGAACAGATGAGAAGCTTGCTTCTCTG  
ATGTTAGCGGCGGACGGGTGAGTAACACGTGGGTAACCTACCTATAAGACTGGGATAACTCC  
GGGAAACCGGGGCTAATACCGGATAATATATTGAACCGCATGGTTCAATGTTGAAAGACGGT

TTCGGCTGTCACTTATAGATGGACCCGCGCCGTATTAGCTAGTTGGTAAGGTAACGGCTTACC  
AAGGCAACGATACGTAGCCGACCTGAGAGGGTGATCGGCCACACTGGAAGTGAAGACACGGT  
CCAGACTCCTACGGGAGGCAGCAGTAGGGAATCTTCCGCAATGGGCGAAAGCCTGACGGAG  
CAACGCCGCGTGAGTGATGAAGGTCTTAGGATCGTAAACTCTGTTGTTAGGGAAGAACAA  
ATTTGTTAGTAACTGAACAAGTCTTGACGGTACCTAACCAGAAAGCCACGGCTAACTACGTG  
CCAGCAGCCGCGGTAATACGTAGGTGGCAAGCGTTATCCGGAATTATTGGGCGTAAAGCGCG  
CGTAGGCGGTTTCTTAAGTCTGATGTGAAAGCCCACGGCTCAACCGTGGAGGGTCATTGGAA  
ACTGGGGAACCTTGAGTGCAGAAGAGGAGAGTGGAATTCCATGTGTAGCGGTGAAATGCGCA  
GAGATATGGAGGAACACCAGTGGCGAAGGCGGCTCTCTGGTCTGTAAGTACGCTGATGTG  
CGAAAGCGTGGGGATCAAACAGGATTAGATACCCTGGTAGTCCACGCCGTAAACGATGAGT  
GCTAAGTGTTAGGGGGTTTCCGCCCTTAGTGCTGCAGCTAACGCATTAAGCACTCCGCCTG  
GGGAGTACGACCGCAAGGTTGAAACTCAAAGGAATTGACGGGGACCCGCACAAGCGGTGG  
AGCATGTGGTTTAATTCGAAGCAACGCGAAGAACCTTACCAAATCTTGACATCCTTTGATCG  
CTCTAGAGATAGAGTTTTCCCTTCGGGGGACAAAGTGACAGGTGGTGCATGGTTGTCGTCA  
GCTCGTGTGTCGTGAGATGTTGGGTTAAGTCCCGCAACGAGCGCAACCCTTAAGCTTAGTTGCC  
ATCATTAAAGTTGGGCACTCTAGGTTGACTGCCGGTGACAAACCGGAGGAAGGTGGGGATGA  
CGTCAAATCATCATGCCCTTATGATTTGGGCTACACACGTGCTACAATGGATAATACAAAGG  
GCAGCGAACCCGCGAGGTCAAGCAAATCCATAAAATTATTCTCAGTTCGGATTGTAGTCTG  
CAACTCGACTACATGAAGCTGGAATCGCTAGTAATCGTAGATCAGCATGCTACGGTGAATACG  
TTCCCGGGTCTTGTACACACCGCCCGTCACACCACGAGAGTTTGTAACACCCGAAGCCGGT  
GGAGTAACCTTTTATTAGGAGCTAGCCGTCGAAGGGTGAACCGGGATGT

>NA3 *Staphylococcus*

CAAACAGTGGCGGCGGTGCCTATAATGCAAGTCGAGCGAACAGATGAGAAGCTTGCTTCTC  
TGATGTTAGCGGCGGACGGGTGAGTAACACGTGGGTAACCTACCTATAAGACTGGGATAACT  
CCGGGAAACCGGGGCTAATACCGGATAATATATTGAACCGCATGGTTCAATGTTGAAAGACG  
GTTTCGGCTGTCACTTATAGATGGACCCGCGCCGTATTAGCTAGTTGGTAAGGTAACGGCTTA  
CCAAGGCAACGATACGTAGCCGACCTGAGAGGGTGATCGGCCACACTGGAAGTGAAGACACG

GTCCAGACTCCTACGGGAGGCAGCAGTAGGGAATCTTCCGCAATGGGCGAAAGCCTGACGG  
AGCAACGCCGCGTGAGTGATGAAGGTCTTAGGATCGTAAACTCTGTTGTTAGGGAAGAAC  
AAATTTGTTAGTAACTGAACAAGTCTTGACGGTACCTAACCAGAAAGCCACGGCTAACTACG  
TGCCAGCAGCCGCGGTAATACGTAGGTGGCAAGCGTTATCCGGAATTATTGGGCGTAAAGCG  
CGCGTAGGCGGTTTCTTAAGTCTGATGTGAAAGCCCACGGCTCAACCGTGGAGGGTTCATTGG  
AACTGGGGAACCTTGAGTGCAGAAGAGGAGAGTGGAATTCATGTGTAGCGGTGAAATGCG  
CAGAGATATGGAGGAACACCAGTGGCGAAGGCGGCTCTCTGGTCTGTAAGTACGCTGATG  
TGCGAAAGCGTGGGGATCAAACAGGATTAGATACCCTGGTAGTCCACGCCGTAAACGATGA  
GTGCTAAGTGTTAGGGGGTTTCCGCCCTTAGTGCTGCAGCTAACGCATTAAGCACTCCGCC  
TGGGGAGTACGACCGCAAGGTTGAAACTCAAAGGAATTGACGGGGACCCGCACAAGCGGT  
GGAGCATGTGGTTTAATTCGAAGCAACGCGAAGAACCTTACCAAATCTTGACATCCTTTGAT  
CGCTCTAGAGATAGAGTTTTCCCTTCGGGGGACAAAGTGACAGGTGGTGCATGGTTGTCGT  
CAGCTCGTGTCGTGAGATGTTGGGTAAAGTCCCGCAACGAGCGCAACCCTTAAGCTTAGTTG  
CCATCATTAAAGTTGGGCACTCTAGGTTGACTGCCGGTGACAAACCGGAGGAAGGTGGGGAT  
GACGTCAAATCATCATGCCCTTATGATTTGGGCTACACACGTGCTACAATGGATAATACAAA  
GGGCAGCGAACCCGCGAGGTCAAGCAAATCCATAAAATTATTCTCAGTTCGGATTGTAGTC  
TGCAACTCGACTACATGAAGCTGGAATCGCTAGTAATCGTAGATCAGCATGCTACGGTGAATA  
CGTTCCCGGGTCTTGTACACACCGCCCGTCACACCACGAGAGTTTGTAACACCCGAAGCCG  
GTGGAGTAACCTTTTATTAGGAGCTAGCCGTCGAAAGGTGGAACAAGAATGT

>NA4 *Escherichia*

ATAAATTGCCGGGCAGCCTTAACACATGCAAGTCGAACGGTAACAGGAAGCAAGCTTGCTG  
CTTCGCTGACGAGTGGCGGACGGGTGAGTAATGTCTGGGAAACTGCCTGATGGAGGGGGAT  
AACTACTGGAAACGGTAGCTAATACCGCATAACGTCGCAAGACCAAAGAGGGGGACCTTCG  
GGCCTCTTGCCATCGGATGTGCCAGATGGGATTAGCTAGTAGGTGGGGTAACGGCTCACCT  
AGGCGACGATCCCTAGCTGGTCTGAGAGGATGACCAGCCACACTGGAAGTGAAGACACGGTC  
CAGACTCCTACGGGAGGCAGCAGTGGGGAATATTGCACAATGGGCGCAAGCCTGATGCAGC  
CATGCCGCGTGTATGAAGAAGGCCTTCGGGTGTAAAGTACTTTCAGCGGGGAGGAAGGGA

GTAAAGTTAATACCTTTGCTCATTGACGTTACCCGCAGAAGAAGCACCGGCTAACTCCGTGC  
CAGCAGCCGCGGTAATACGGAGGGTGCAAGCGTTAATCGGAATTACTGGGCGTAAAGCGCA  
CGCAGGCCGTTTTGTTAAGTCAGATGTGAAATCCCCGGGCTCAACCTGGGAACTGCATCTGAT  
ACTGGCAAGCTTGAGTCTCGTAGAGGGGGGTAGAATTCCAGGTGTAGCGGTGAAATGCGTA  
GAGATCTGGAGGAATACCGGTGGCGAAGGCGGCCCCCTGGACGAAGACTGACGCTCAGGT  
GCGAAAGCGTGGGGAGCAAACAGGATTAGATACCCTGGTAGTCCACGCCGTAAACGATGTC  
GACTTGGAGGTTGTGCCCTTGAGGCGTGGCTTCCGGAGCTAACGCGTTAAGTCGACCGCCT  
GGGGAGTACGGCCGCAAGGTTAAACTCAAATGAATTGACGGGGGCCCGCACAAAGCGGTG  
GAGCATGTGGTTTAATTCGATGCAACGCGAAGAACCTTACCTGGTCTTGACATCCACGGAAG  
TTTTCAGAGATGAGAATGTGCCTTCGGGAACCGTGAGACAGGTGCTGCATGGCTGTCGTCAG  
CTCGTGTGTGAAATGTTGGGTAAAGTCCCGCAACGAGCGCAACCCTTATCCTTTGTTGCCA  
GCGGTCCGGCCGGGAACTCAAAGGAGACTGCCAGTGATAAACTGGAGGAAGGTGGGGATG  
ACGTCAAGTCATCATGGCCCTTACGACCAGGGCTACACACGTGCTACAATGGCGCATAAAA  
GAGAAGCGACCTCGCGAGAGCAAGCGGACCTCATAAAGTGCGTCGTAGTCCGGATTGGAGT  
CTGCAACTCGACTCCATGAAGTCGGAATCGCTAGTAATCGTGGATCAGAATGCCACGGTGAA  
TACGTTCCCGGGCCTTGACACACCGCCCGTCACACCATGGGAGTGGGTTGCAAAGAAGT  
AGGTAGCTTAACCTTCGGGAGGGCGGCTAACCCACTTTTGATTTAAGGGG

>BHIA1 *Staphylococcus*

GGGGACGTTGCGGGGGTGCTATTACATGCAAGTCGAGCGAACAGATGAGAAGCTTGCTTCT  
CTGATGTTAGCGGCGGACGGGTGAGTAACACGTGGGTAACCTACCTATAAGACTGGGATAAC  
TCCGGGAAACCGGGGCTAATACCGGATAATATATTGAACCGCATGGTTCAATGTTGAAAGAC  
GGTTTCGGCTGTCACTTATAGATGGACCCGCGCCGTATTAGCTAGTTGGTAAGGTAACGGCTT  
ACCAAGGCAACGATACGTAGCCGACCTGAGAGGGTGATCGGCCACACTGGAAGTGGAGACAC  
GGTCCAGACTCCTACGGGAGGCAGCAGTAGGGAATCTTCGCAATGGGCGAAAGCCTGACG  
GAGCAACGCCGCGTGAGTGATGAAGGTCTTAGGATCGTAAACTCTGTTGTTAGGGAAGAA  
CAAATTTGTTAGTAACTGAACAAGTCTTGACGGTACCTAACCAGAAAGCCACGGCTAACTAC  
GTGCCAGCAGCCGCGGTAATACGTAGGTGGCAAGCGTTATCCGGAATTATTGGGCGTAAAGC



GCGCGTAGGCGGTTTCTTAAGTCTGATGTGAAAGCCCACGGCTCAACCGTGGAGGGTCATTG  
GAAACTGGGGAACTTGAGTGCAGAAGAGGAGAGTGGAATTCCATGTGTAGCGGTGAAATGC  
GCAGAGATATGGAGGAACACCAGTGGCGAAGGCGGCTCTCTGGTCTGTAAGTACGCTGAT  
GTGCGAAAGCGTGGGGATCAAACAGGATTAGATACCCTGGTAGTCCACGCCGTAAACGATG  
AGTGCTAAGTGTTAGGGGGTTTCCGCCCCTTAGTGCTGCAGCTAACGCATTAAGCACTCCGC  
CTGGGGAGTACGACCGCAAGGTTGAAACTCAAAGGAATTGACGGGGACCCGCACAAGCGG  
TGGAGCATGTGGTTTAATTCGAAGCAACGCGAAGAACCTTACCAAATCTTGACATCCTTTGA  
TCGCTCTAGAGATAGAGTTTTCCCTTCGGGGGACAAAGTGACAGGTGGTGCATGGTTGTCG  
TCAGCTCGTGTCGTGAGATGTTGGGTTAAGTCCCGCAACGAGCGCAACCCTTAAGCTTAGTT  
GCCATCATTAAGTTGGGCACTCTAGGTTGACTGCCGGTGACAAACCGGAGGAAGGTGGGGA  
TGACGTCAAATCATCATGCCCTTATGATTTGGGCTACACACGTGCTACAATGGATAATACAA  
AGGGCAGCGAACCCGCGAGGTCAAGCAAATCCCATAAAATTATTCTCAGTTCGGATTGTAGT  
CTGCAACTCGACTACATGAAGCTGGAATCGCTAGTAATCGTAGATCAGCATGCTACGGTGAAT  
ACGTTCCCGGGTCTTGTACACACCGCCCGTCACACCGGCGAGAGTTTGTAACACCCGAAGC  
CGGTGGAGTAACCTTTTATTAGGAGCTAGCCGTCGAAAGTTGAACCAGGATGT

>BHA2 *Staphylococcus*

AGAAACGTGCGGCGTGCTAATAATGCAAGTCGAGCGAACAGATAAGGAGCTTGCTCCTTTG  
ACGTTAGCGGCGGAAGGGTGAGTAACACGTGGGTAACCTACCTATAAGACTGGGATAACTTC  
GGGAAACCGGAGCTAATACCGGATAACATTTGGAACCGCATGGTTCTAAAGTGAAAGATGGT  
TTTGCTATCACTTATAGATGGACCCGCGCCGTATTAGCTAGTTGGTAAGGTAACGGCTTACCA  
AGGCGACGATACGTAGCCGACCTGAGAGGGTGATCGGCCACACTGGAAGTGAACACGGTC  
CAGACTCCTACGGGAGGCAGCAGTAGGGAATCTTCCGCAATGGGCGAAAGCCTGACGGAGC  
AACGCCGCGTGAGTGATGAAGGGTTTCGGCTCGTAAACTCTGTTATTAGGGAAGAACAAT  
GTGTAAGTAACTGTGCACATCTTGACGGTACCTAATCAGAAAGCCACGGCTAACTACGTGCC  
AGCAGCCGCGGTAATACGTAGGTGGCAAGCGTTATCCGGAATTATTGGGCGTAAAGCGCGCG  
TAGGCGGTTTCTTAAGTCTGATGTGAAAGCCCACGGCTCAACCGTGGAGGGTCATTGGAAAC  
TGGGAAACTTGAGTGCAGAAGAGGAAAGTGGAATTCCATGTGTAGCGGTGAAATGCGCAGA

GATATGGAGGAACACCAGTGGCGAAGGCGACTTTCTGGTCTGTAAGTACGCTGATGTGCG  
AAAGCGTGGGGATCAAACAGGATTAGATACCCTGGTAGTCCACGCCGTAAACGATGAGTGCT  
AAGTGTTAGGGGGTTTCCGCCCTTAGTGCTGCAGCTAACGCATTAAGCACTCCGCCTGGGG  
AGTACGACCGCAAGGTTGAAACTCAAAGGAATTGACGGGGACCCGCACAAGCGGTGGAGC  
ATGTGGTTTAATTCGAAGCAACGCGAAGAACCTTACCAAATCTTGACATCCTTTGAAAATC  
TAGAGATAGAGCCTTCCCCTTCGGGGGACAAAGTGACAGGTGGTGCATGGTTGTCGTCAGCT  
CGTGTCGTGAGATGTTGGGTAAAGTCCCGCAACGAGCGCAACCCTTAAGCTTAGTTGCCATC  
ATTAAGTTGGGCACTCTAAGTTGACTGCCGGTGACAAACCGGAGGAAGGTGGGGATGACGT  
CAAATCATCATGCCCTTATGATTTGGGCTACACACGTGCTACAATGGACAATACAAAGGGCA  
GCTAAACCGCGAGGTCATGCAAATCCATAAAGTTGTTCTCAGTTCGGATTGTAGTCTGCAA  
CTCGACTACATGAAGCTGGAATCGCTAGTAATCGTAGATCAGCATGCTACGGTGAATACGTTT  
CCGGGTCTTGTACACACCGCCCGTCACACCACGAGAGTTTGTAACACCCGAAGCCGGTGA  
GTAACCATTATGGAGCTAGCCCGTCGAAAGGTTGAACCCAGTGGG

>BHIA3 *Kocuria*

GGCAAAGGGCGGGGTGCTTAAAATGCAAGTCGAACGCTGAAGCTTGGTGCTTGCACCGGGT  
GGATGAGTGGCGAACGGGTGAGTAATACGTGAGTGACCTACCTTGGACTCTGGGATAAGCCT  
GGGAAACTGGGTCTAATACCGGATATGACCAATGGGCGCATGCTCTGTTGGTGGAAAGGGTT  
TGTAAGTGGTCTTTGATGGGCTCACGGCCTATCAGCTTGTGGTGGAGTAATGGCTTACCAAGG  
CGACGACGGGTAGCCGGCCTGAGAGGGTGACCGGCCACACTGGGACTGAGACACGGCCCA  
GACTCCTACGGGAGGCAGCAGTGGGGAATATTGCACAATGGGCGCAAGCCTGATGCAGCGA  
CGCCGCGTGAGGGATGACGGCCTTCGGGTGTAAACCTCTTTCAGCAGGGAAGAAGCGAAA  
GTGACGGTACCTGCAGAAGAAGCGCCGGCTAACTACGTGCCAGCAGCCGCGGTAATACGTA  
GGGCGCAAGCGTTGTCCGGAATTATTGGGCGTAAAGAGCTCGTAGGCGGTTTGTGCGGTCTG  
CTGTGAAAGCCCGGGGCTTAACCCCGGGTGTGCAGTGGGTACGGGCAGGCTAGAGTGCAGT  
AGGGGAGACTGGAATTCCTGGTGTAGCGGTGAAATGCGCAGATATCAGGAGGAACACCGAT  
GGCGAAGGCAGGTCTCTGGGCTGTTACTGACGCTGAGGAGCGAAAGCATGGGGAGCGAAC  
AGGATTAGATACCCTGGTAGTCCATGCCGTAAACGTTGGGCACTAGGTGTGGGGGACATTCC

ACGTTTTCCGCGCCGTAGCTAACGCATTAAGTGCCCCGCCTGGGGAGTACGGCCGCAAGGCT  
AAAAC TCAAAGGAATTGACGGGGGCCGCACAAGCGGCGGAGCATGCGGATTAATTCGATG  
CAACGCGAAGAACCTTACCAAGGCTTGACATACACCGGATCGCAGCAGAGATGTTGTTTCCT  
TTCGGGGCTGGTGTACAGGTGGTGCATGGTTGTCGTCAGCTCGTGTTCGTGAGATGTTGGGT  
AAGTCCCGCAACGAGCGCAACCCTCGTTCTATGTTGCCAGCACGTGATGGTGGGGACTCATA  
GGAGACTGCCGGGGTCAACTCGGAGGAAGGTGGGGATGACGTCAAATCATCATGCCCTTA  
TGTCTTGGGCTTCACGCATGCTACAATGGCCGGTACAATGGGTTGCGATACTGTGAGGTGGA  
GCTAATCCCAAAAAGCCGGTCTCAGTTCGGATTGGGGTCTGCAACTCGACCCCATGAAGTCG  
GAGTCGCTAGTAATCGCAGATCAGCAACGCTGCGGTGAATACGTTCCCGGGCCTTGTACACA  
CCGCCCGTCAAGTCACGAAAGTCGGTAACACCCGAAGCCGATGGCCTAACCCCTTTGTGGGG  
GGAGTCGTCGAAGGGTTGAGCCGTAAAC
